# Supplementary material for: Family History, Tobacco Smoking, and Risk of Ischemic Stroke
Source: PubMed Central journal article supplement — J Stroke. 2019 May 31;21(2):175–83. doi: 10.5853/jos.2018.03566 (PMC6549063; doi:10.5853/jos.2018.03566), 2019-05-31
Supplement: jos-2018-03566-suppl2.pdf [file jos-2018-03566-suppl2.pdf]

**Supplementary Table 1.** Multivariable-adjusted HRs (95% CIs) for incident ischemic stroke according to family history of stroke

| Variable                     | Family history of stroke |                  |
|------------------------------|--------------------------|------------------|
|                              | No                       | Yes              |
| <b>Total population</b>      |                          |                  |
| No. of participants          | 401,227                  | 85,971           |
| No. of ischemic stroke cases | 28,556                   | 9,023            |
| Cases per 1,000 PYs          | 7.33                     | 10.89            |
| HR (95% CI)                  |                          |                  |
| Sex adjusted                 | Ref                      | 1.25 (1.22–1.28) |
| Multivariable adjusted*      | Ref                      | 1.19 (1.16–1.22) |
| <b>Men</b>                   |                          |                  |
| No. of participants          | 163,791                  | 35,449           |
| No. of ischemic stroke cases | 12,933                   | 3,990            |
| Cases per 1,000 PYs          | 8.30                     | 11.89            |
| HR (95% CI)                  |                          |                  |
| Crude                        | Ref                      | 1.25 (1.21–1.30) |
| Multivariable adjusted*      | Ref                      | 1.19 (1.15–1.23) |
| <b>Women</b>                 |                          |                  |
| No. of participants          | 237,436                  | 50,522           |
| No. of ischemic stroke cases | 15,623                   | 5,033            |
| Cases per 1,000 PYs          | 6.69                     | 10.21            |
| HR (95% CI)                  |                          |                  |
| Crude                        | Ref                      | 1.25 (1.21–1.29) |
| Multivariable adjusted*      | Ref                      | 1.19 (1.15–1.23) |

Multivariable model was stratified by age and study area.

HR, hazard ratio; CI, confidence interval; PY, person-year.

\*Adjusted for level of education; marital status; household income; alcohol consumption; smoking status; physical activity; intake frequencies of red meat, fresh fruits, and vegetables; menopause status (only for women); body mass index; and prevalent diabetes and hypertension.
