# Supplementary material for: Family History, Tobacco Smoking, and Risk of Ischemic Stroke
Source: PubMed Central journal article supplement — J Stroke. 2019 May 31;21(2):175–83. doi: 10.5853/jos.2018.03566 (PMC6549063; doi:10.5853/jos.2018.03566), 2019-05-31
Supplement: jos-2018-03566-suppl3.pdf [file jos-2018-03566-suppl3.pdf]

**Supplementary Table 2.** Associations between each type of family history and ischemic stroke risk, according to smoking status

| Variable         | Never-smokers    | Ever-regular smokers | <i>P</i> <sub>interaction</sub> |
|------------------|------------------|----------------------|---------------------------------|
| <b>Men</b>       |                  |                      |                                 |
| Paternal history | 1.17 (1.03–1.33) | 1.23 (1.16–1.31)     | 0.083                           |
| Maternal history | 1.14 (1.00–1.31) | 1.22 (1.14–1.29)     | 0.122                           |
| Parental history | 1.12 (1.01–1.25) | 1.21 (1.15–1.27)     | 0.021                           |
| Sibling history  | 1.21 (1.03–1.42) | 1.22 (1.12–1.33)     | 0.648                           |
| <b>Women</b>     |                  |                      |                                 |
| Paternal history | 1.21 (1.16–1.27) | 1.30 (1.06–1.61)     | 0.626                           |
| Maternal history | 1.20 (1.15–1.26) | 1.37 (1.11–1.70)     | 0.233                           |
| Parental history | 1.19 (1.15–1.23) | 1.29 (1.09–1.53)     | 0.435                           |
| Sibling history  | 1.22 (1.14–1.30) | 1.44 (1.15–1.80)     | 0.257                           |

Values are presented as hazard ratio (95% confidence interval). Stratified by age and study area and adjusted for level of education; marital status; household income; alcohol consumption; physical activity; intake frequencies of red meat, fresh fruits, and vegetables; menopause status (only for women); body mass index; prevalent hypertension; prevalent diabetes.
